# Supplementary material
Source: Elsevier journal article supplement (https://www.sciencedirect.com/science/article/pii/S0213911119302547)
Supplement: mmc1 [file S0213911119302547:mmc1.docx]

| **Apéndice**  **Consumo de bebidas energéticas en una muestra de estudiantes de 4º curso de Educación Secundaria Obligatoria, según variables de perfil de salud y hábitos relacionados. Barcelona, 2016** | | | | |
| --- | --- | --- | --- | --- |
|  | **Consumo de bebidas energéticas** | | |  |
| **Diario**  **N (%)** | **Semanal**  **N (%)** | **No consumo**  **N (%)** | **p** |
| *Ocio nocturno en días laborales*a | | | | |
| Sí | 47 (27,6) | 53 (31,2) | 70 (41,2) | <0,0001 |
| No | 801 (10,7) | 1385 (18,5) | 5282 (70,7) |
| *Hora de regreso a casa*a | | | | |
| Antes de las 12 | 144 (11,5) | 230 (18,3) | 881 (70,2) | <0,0001 |
| Entre las 12 y las 2 | 220 (10,2) | 419 (19,5) | 1512 (70,3) |
| Entre las 2 y las 4 | 190 (11,7) | 327 (20,1) | 1106 (68,1) |
| Después de las 4 | 263 (19,8) | 306 (23,0) | 759 (57,2) |
| Nunca ha salido de noche | 132 (8,0) | 243 (14,6) | 1284 (77,4) |
| *Percepción del consumo de alcohol*a | | | | |
| Negativa | 227 (9,5) | 359 (15,0) | 1815 (75,6) | <0,0001 |
| Neutra | 423 (12,3) | 695 (20,2) | 2321 (67,5) |
| Positiva | 235 (13,0) | 408 (22,5) | 1169 (64,5) |
| *Amigos consumidores de sustancias*a | | | | |
| Ninguno | 178 (10,1) | 286 (16,3) | 1291 (73,6) | <0,0001 |
| Alguno | 394 (10,2) | 749 (19,4) | 2711 (70,3) |
| Todos o casi todos | 300 (15,3) | 402 (20,5) | 1259 (64,2) |
| *Bullying o acoso escolar*a | | | | |
| No afectado/a | 723 (10,5) | 1255 (18,3) | 4898 (71,2) | <0,0001 |
| Víctima de acoso escolar | 76 (13,9) | 87 (15,9) | 384 (70,2) |
| Agresor/a | 122 (25,0) | 151 (30,9) | 215 (44,1) |
| Víctima y agresor/a | 39 (29,1) | 37 (27,6) | 58 (43,3) |
| *Víctima de acoso sexual*a | | | | |
| Sí | 126 (12,9) | 148 (15,2) | 700 (71,9) | 0,0040 |
| No | 801 (11,5) | 1362 (19,5) | 4809 (69,0) |
| *Relación con los padres*a | | | | |
| Muy buena | 428 (11,8) | 691 (19,1) | 2507 (69,1) | 0,0021 |
| Buena | 259 (10,1) | 488 (18,9) | 1830 (71,0) |
| Regular | 166 (13,5) | 235 (19,1) | 829 (67,4) |
| Mala | 88 (15,9) | 102 (18,5) | 362 (65,6) |
| *Índice de masa corporal*b | | | | |
| Bajo peso | 81 (12,5) | 118 (18,2) | 450 (69,3) | 0,0478 |
| Normopeso | 620 (10,9) | 1078 (19,0) | 3969 (70,0) |
| Sobrepeso/obesidad | 179 (13,8) | 250 (19,2) | 870 (67,0) |
| *Adherencia a la dieta mediterránea*b | | | | |
| Baja adherencia | 250 (12,6) | 389 (19,6) | 1342 (67,7) | 0,0041 |
| Adherencia moderada | 399 (10,7) | 745 (20,0) | 2589 (69,4) |
| Alta adherencia | 197 (11,7) | 275 (16,3) | 1213 (72,0) |
| *Estado anímico*b | | | | |
| Positivo | 657 (10,9) | 1165 (19,3) | 4203 (69,8) | <0,0001 |
| Negativo | 256 (14,6) | 309 (17,6) | 1188 (67,8) |
| *Consumo de cánnabis*b | | | | |
| Sí | 435 (16,9) | 653 (25,4) | 1483 (57,7) | <0,0001 |
| No | 367 (8,4) | 706 (16,2) | 3294 (75,4) |
| *Víctima de maltrato físico*b | | | | |
| Sí | 174 (15,7) | 227 (20,5) | 706 (63,8) | <0,0001 |
| No | 726 (10,9) | 1256 (18,9) | 4665 (70,2) |
| *Víctima de maltrato psicológico*b | | | | |
| Sí | 285 (11,7) | 410 (16,9) | 1731 (71,4) | 0,0071 |
| No | 561 (10,8) | 1031 (19,9) | 3601 (69,3) |

a Variables que no resultaron estadísticamente significativas una vez ajustadas en el modelo.

b Variables que no se introdujeron en el modelo debido a su elevado número de *missings*.
